# Supplementary material for: Rhinacanthin-C but Not -D Extracted from Rhinacanthus nasutus (L.) Kurz Offers Neuroprotection via ERK, CHOP, and LC3B Pathways
Source: MDPI journal article supplement (doi:10.3390/ph15050627), 2022-05-20
Supplement: s1 [file s1]

## Rhinacanthin C

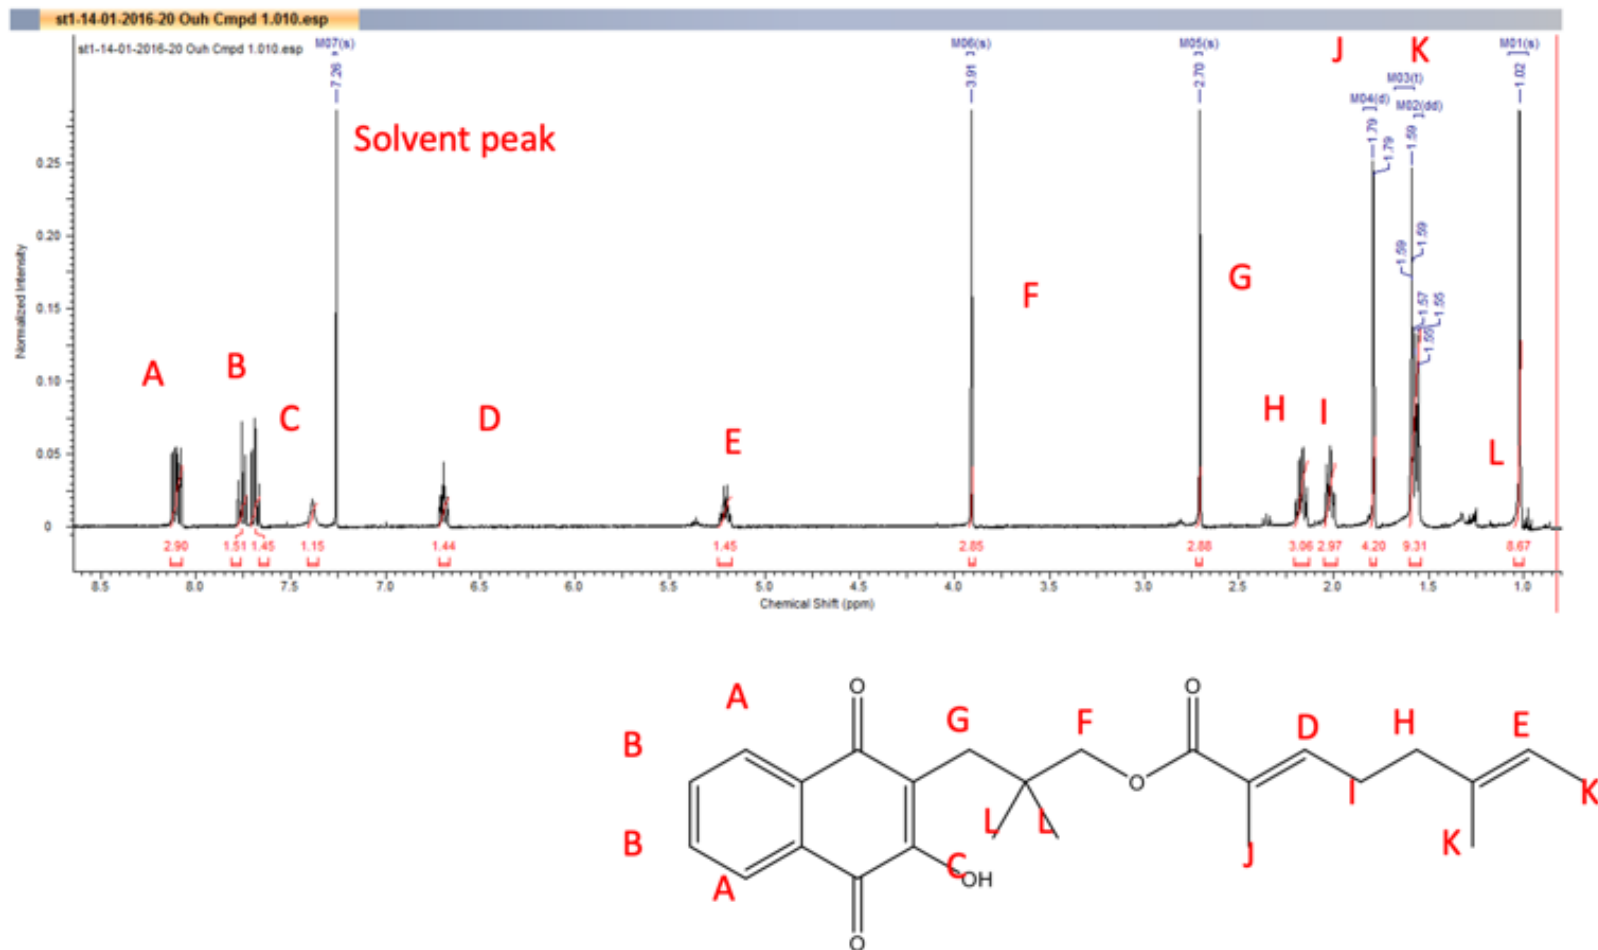Supplementary Figure S1. A <sup>1</sup>H NMR spectrum (1-dimensional) of Rhinacanthin C plotted as signal intensity vs. chemical shift. Full plot.

**B**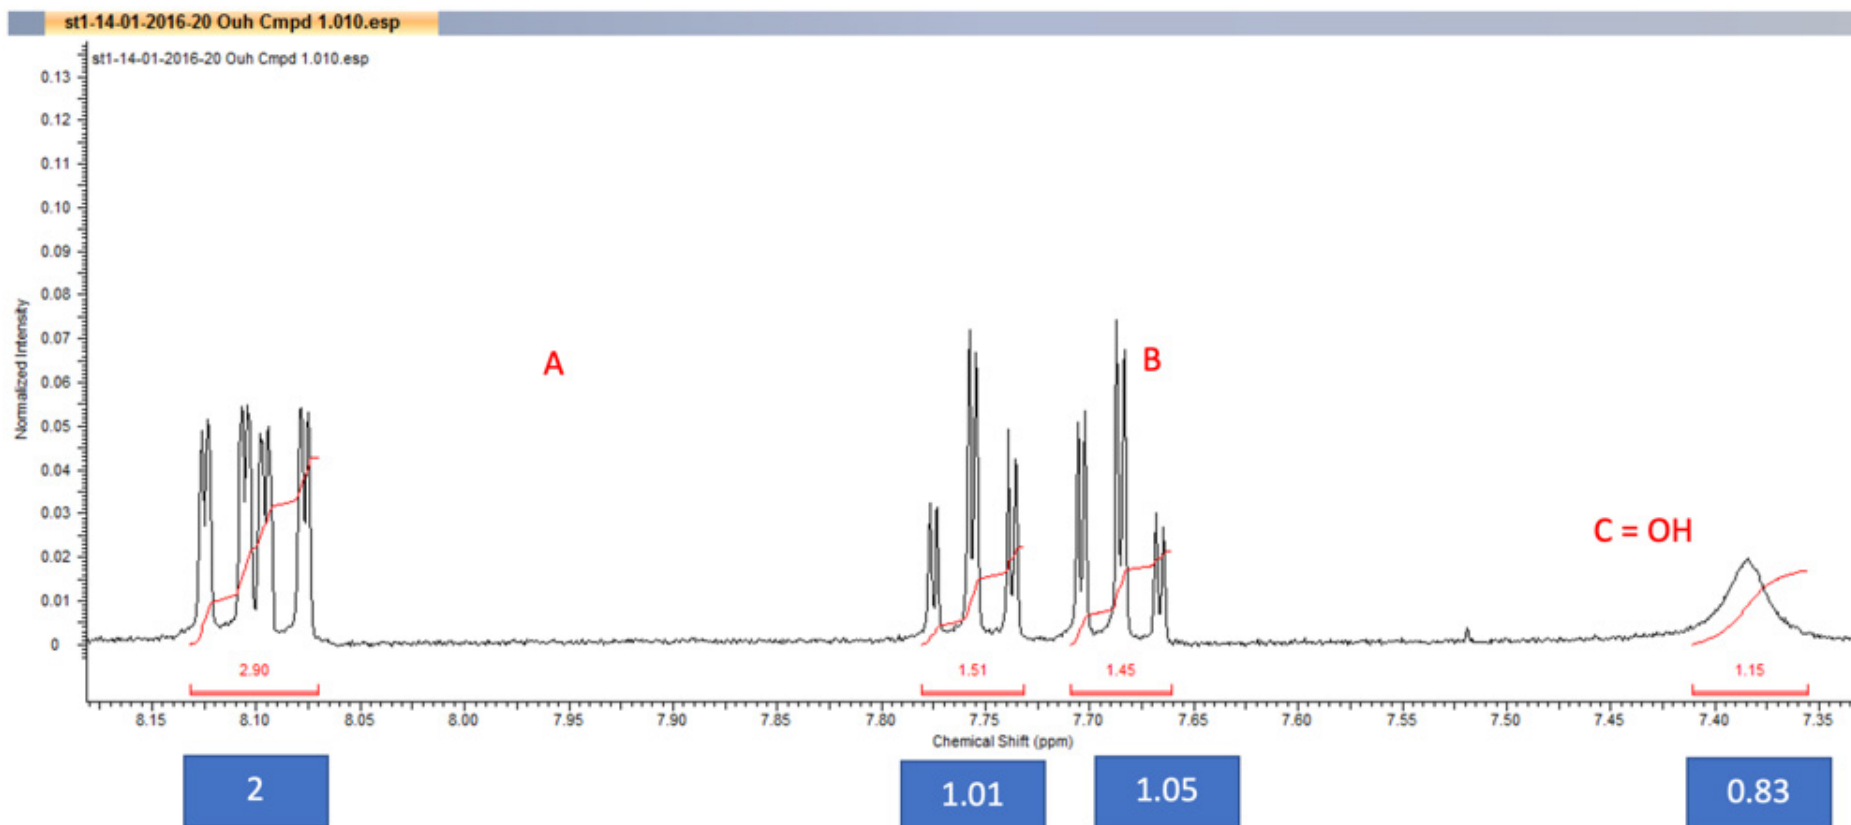

Supplementary Figure S1. **B**  $^1\text{H}$  NMR spectrum of Rhinacanthin C, highlighting the aromatic portion of Rhinacanthin C (A-B from Sup. Fig. 1A) plus the -OH group. (C from Sup. Fig. 1A).

C

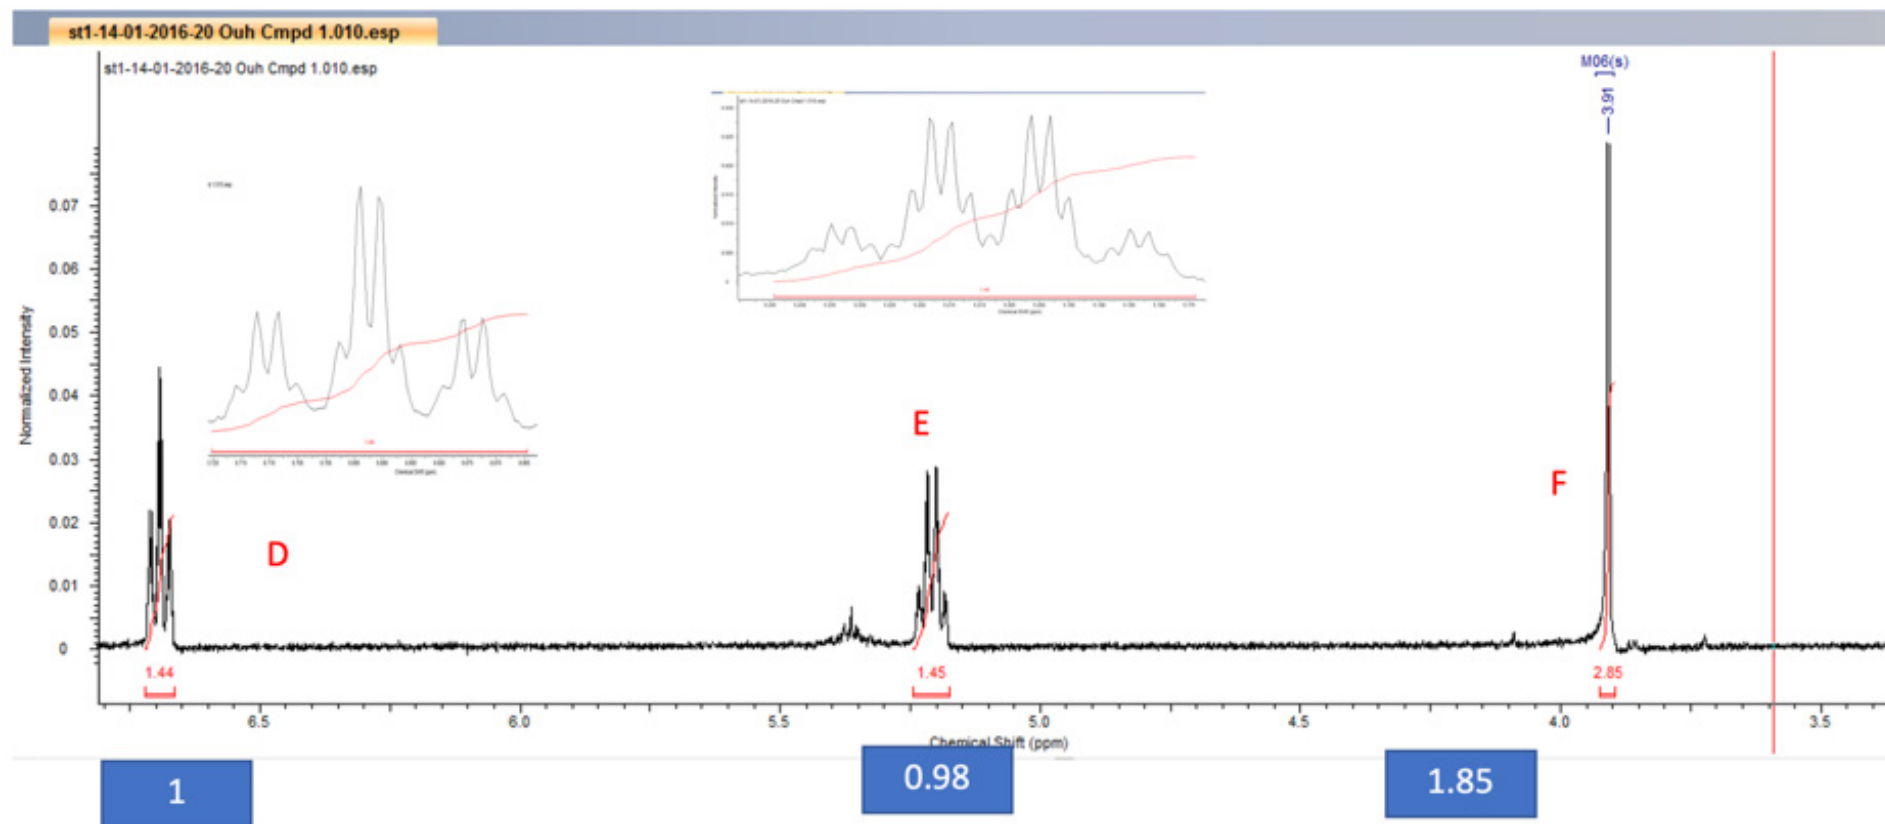

Supplementary Figure S1 C.  $^1\text{H}$  NMR spectrum of Rhinacanthin C, highlighting the carbon atoms D, E & F from Sup. Fig. 1A

D

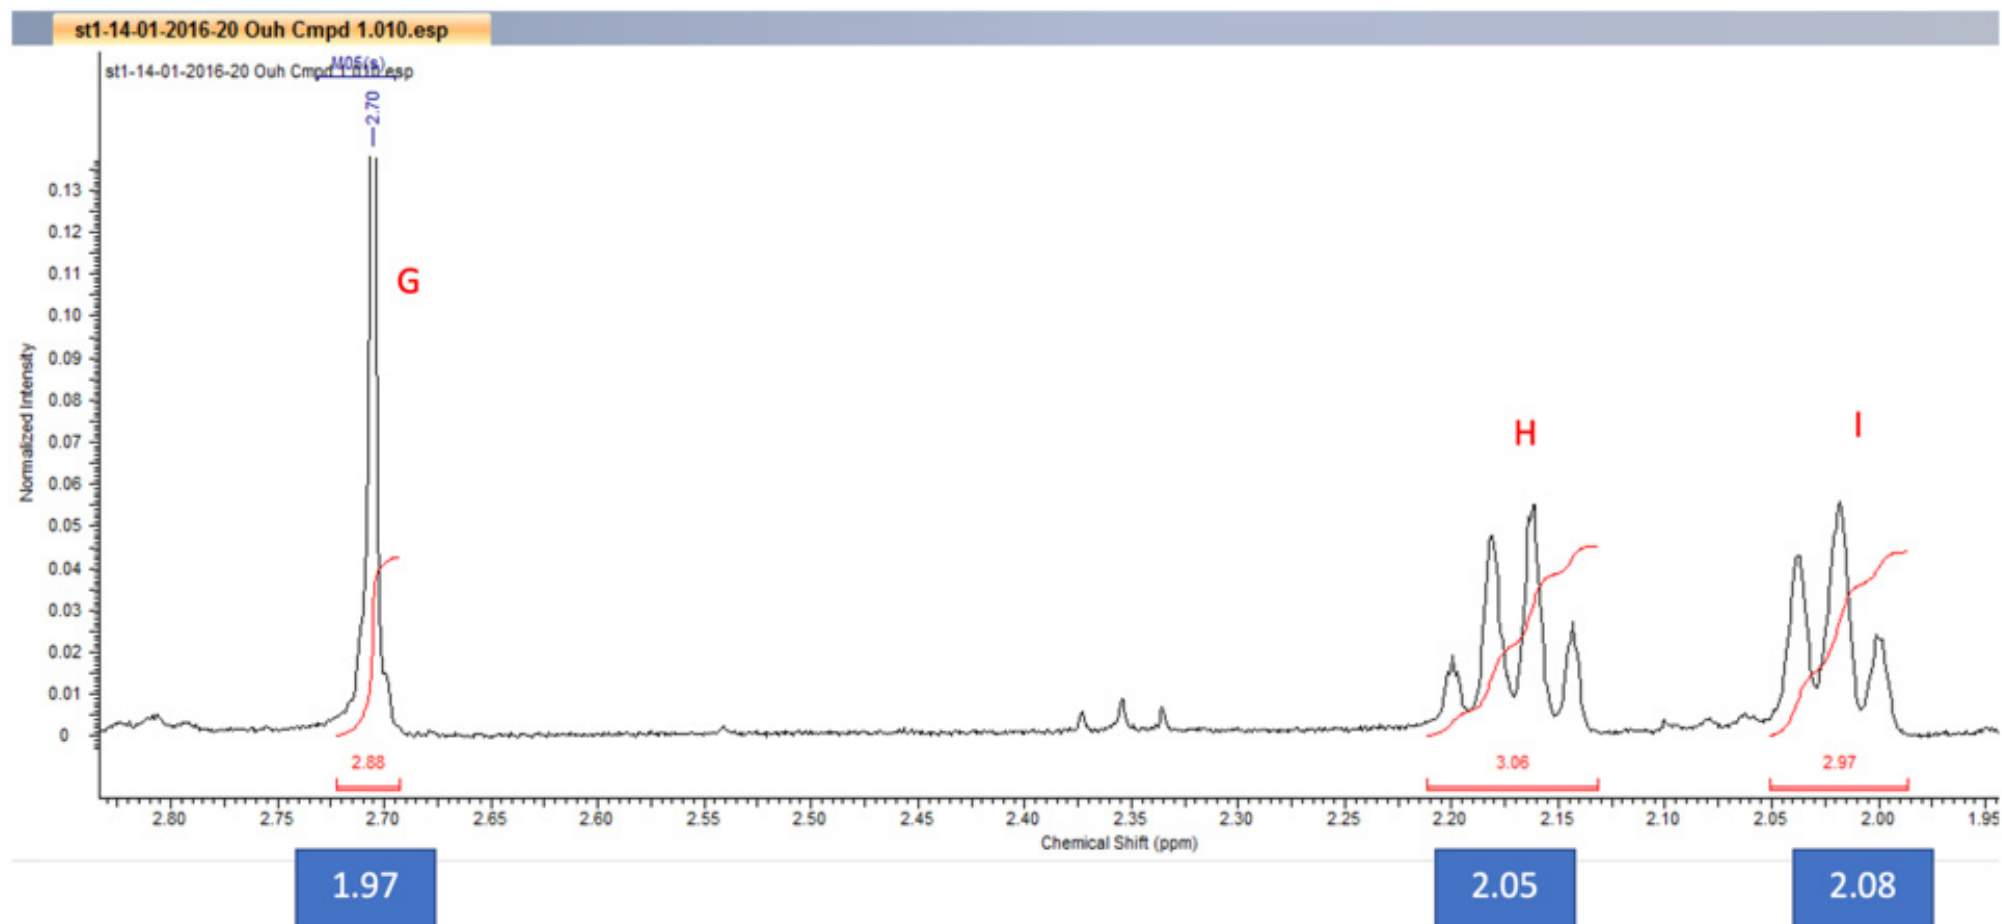

Supplementary Figure S1 D.  $^1\text{H}$  NMR spectrum of Rhinacanthin C, highlighting the carbon atoms G, H & I from Sup. Fig. 1A

A

# Rhinacanthin-D

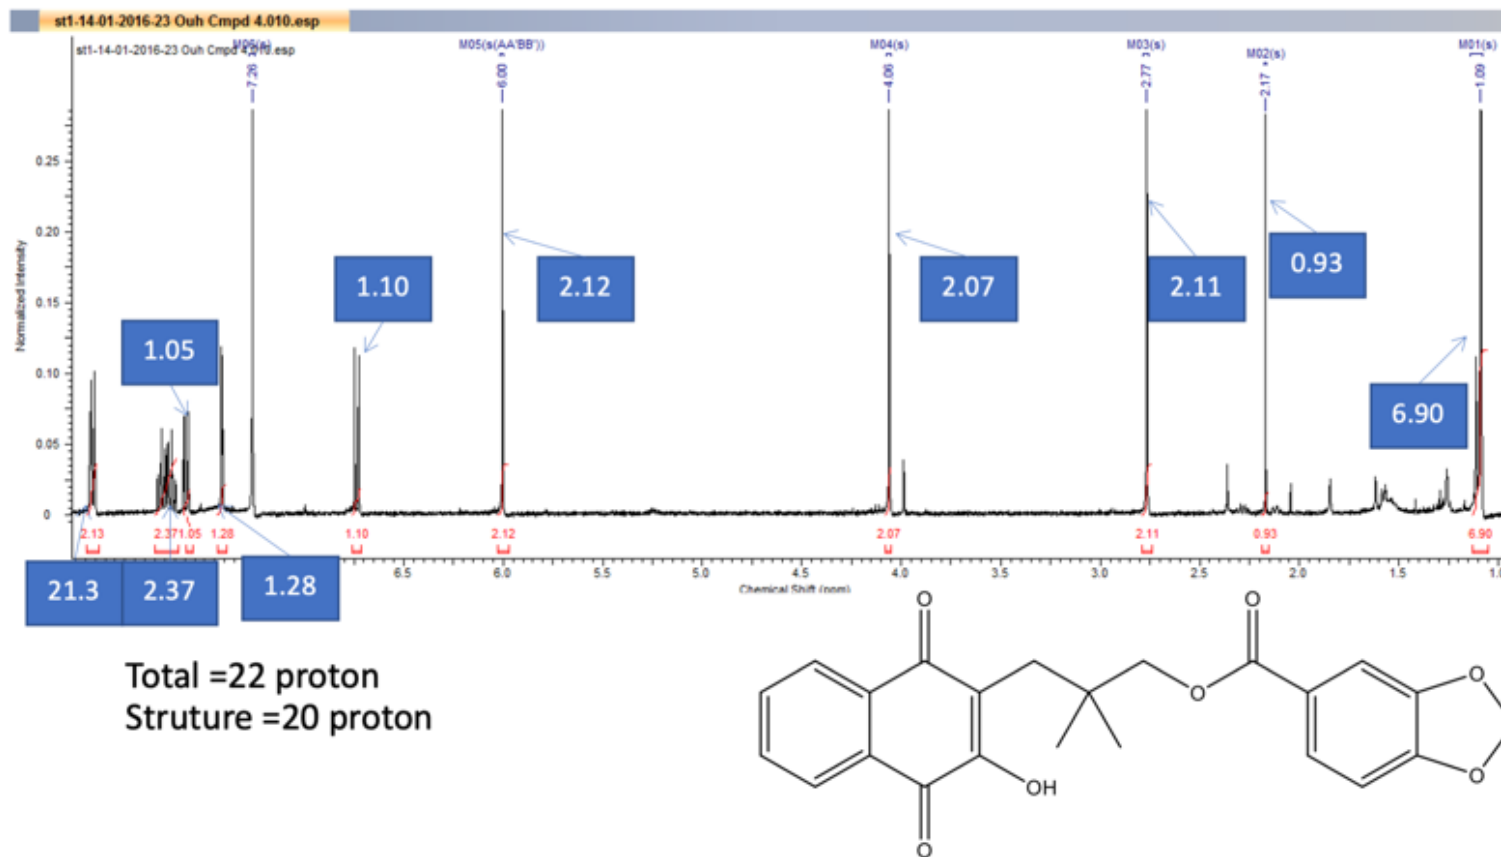

Supplementary Figure S2A. <sup>1</sup>H NMR spectrum of Rhinacanthin D, plotted as signal intensity vs. chemical shift. Full plot.

**B**

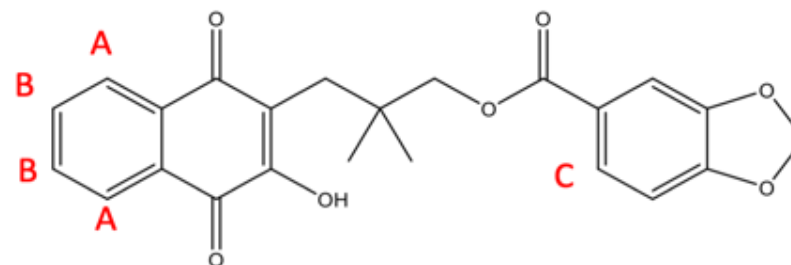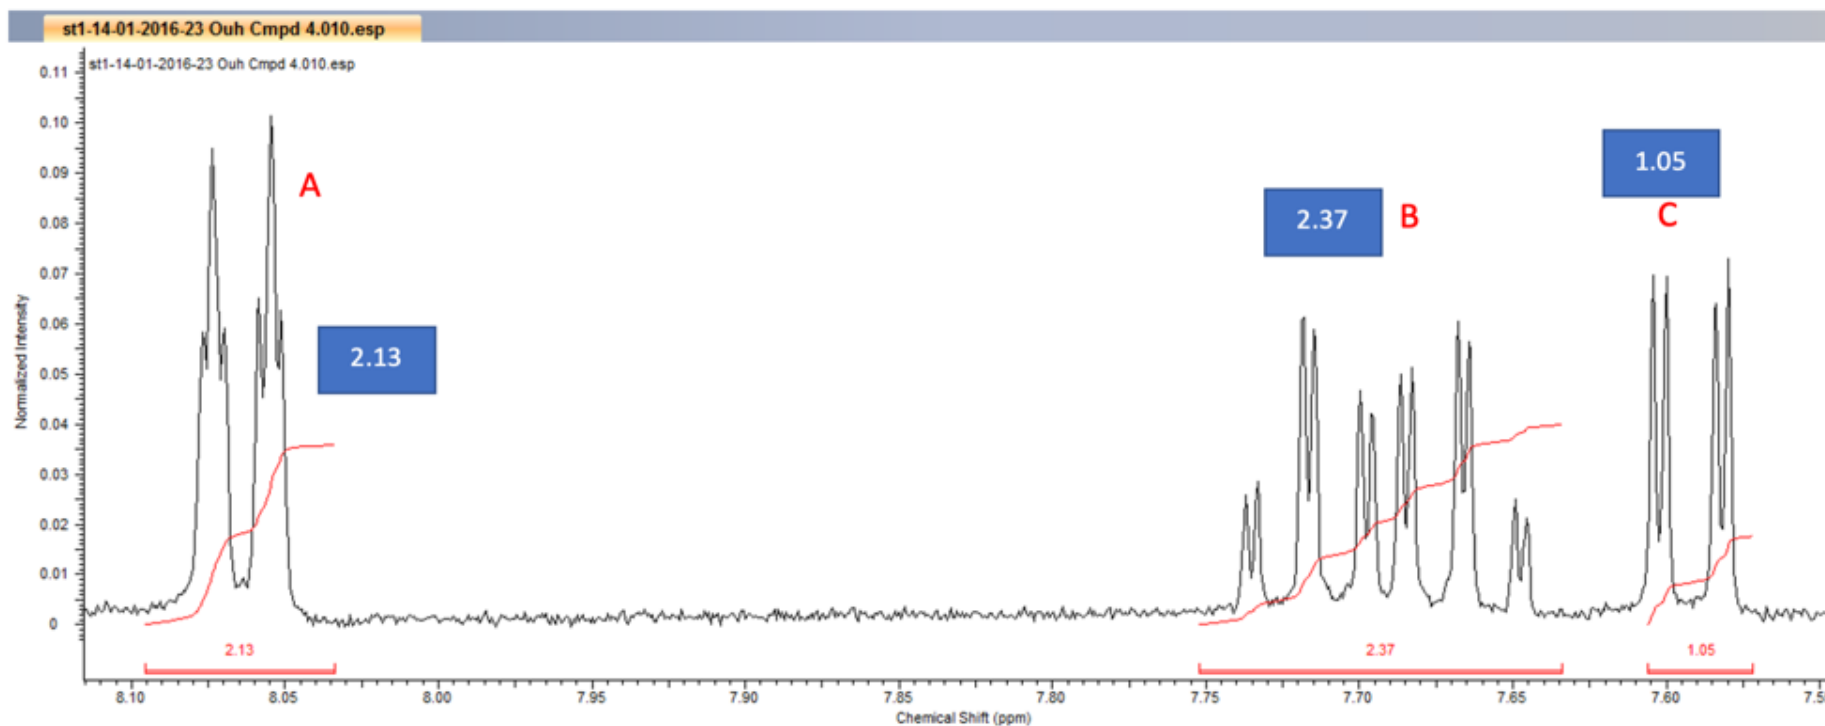

Supplementary Figure S2B. <sup>1</sup>H NMR spectrum of Rhinacanthin C, highlighting the aromatic portion of Rhinacanthin D

C

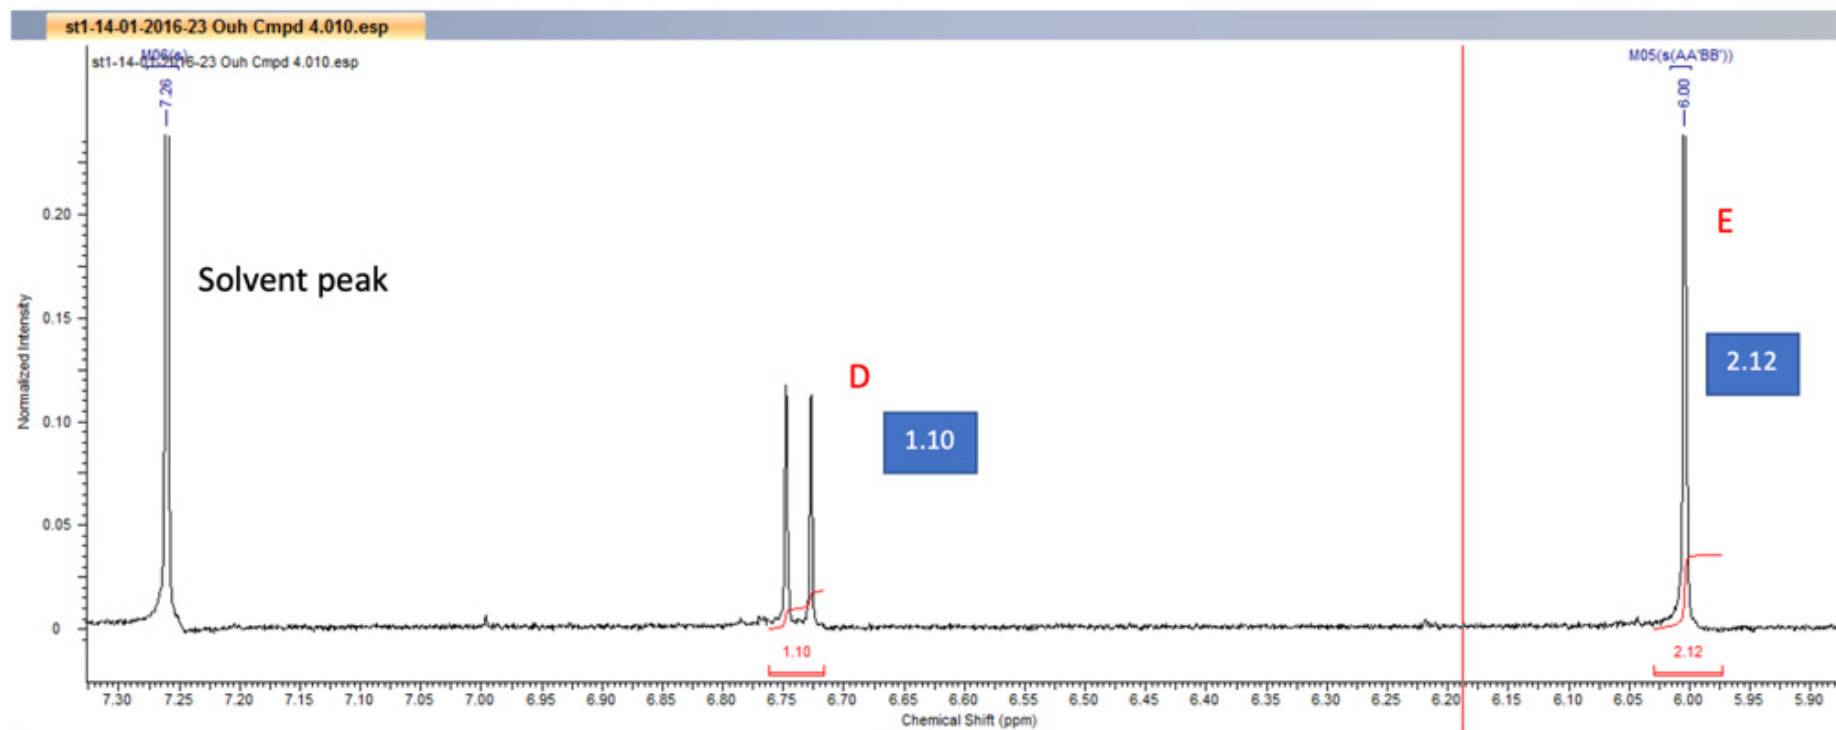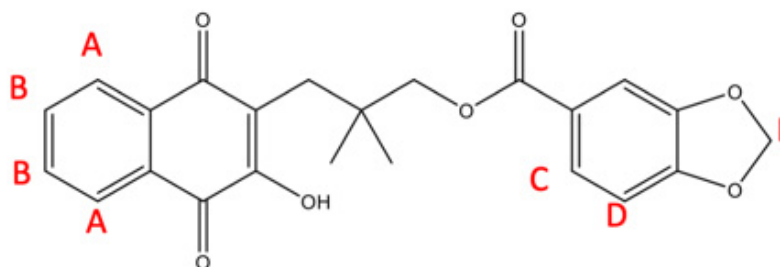

Supplementary Figure S2C.  $^1\text{H}$  NMR spectrum of Rhinacanthin C, highlighting the aromatic portion of Rhinacanthin D

D

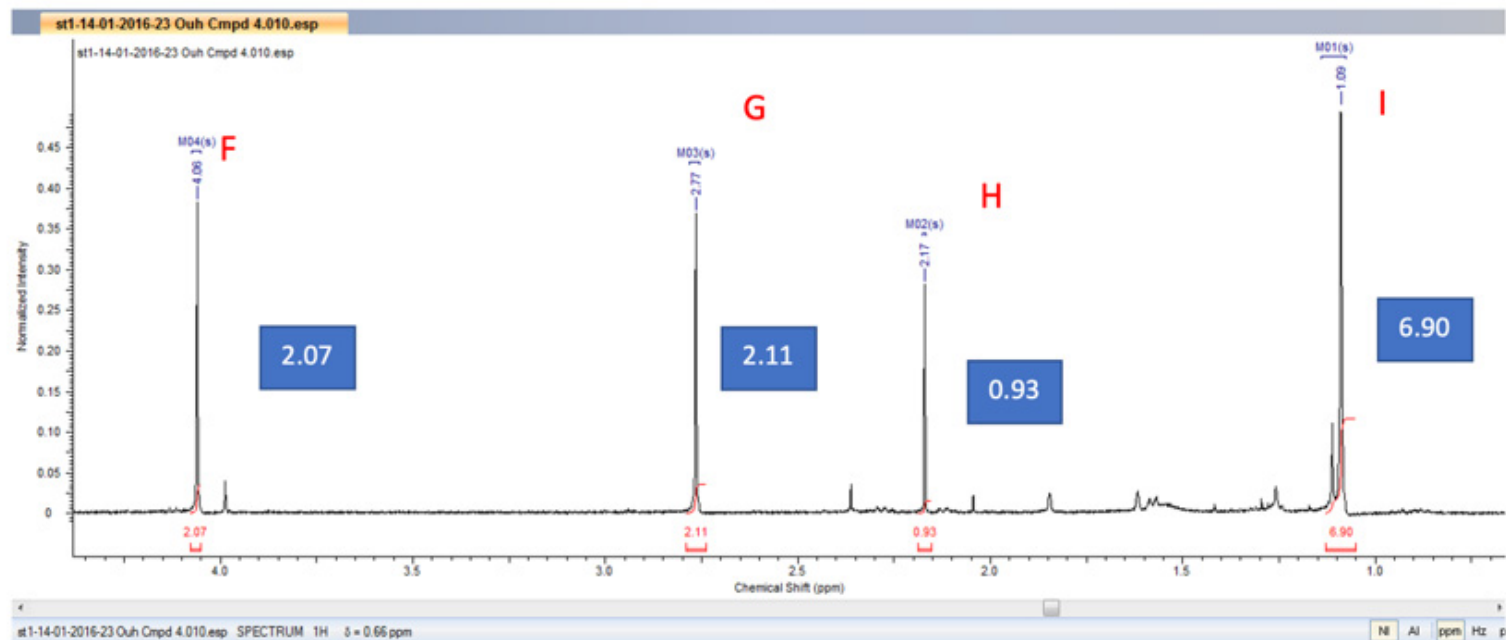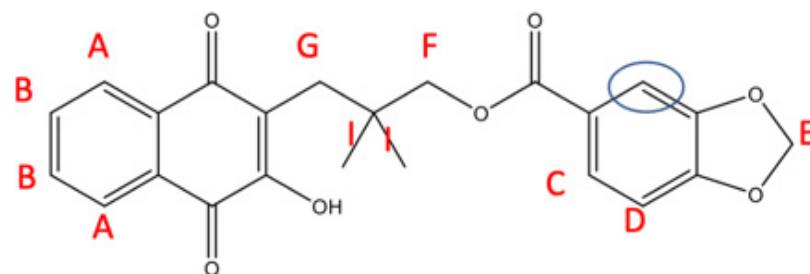

Supplementary Figure S2D. <sup>1</sup>H NMR spectrum of Rhinacanthin C, highlighting the carbon F,G, H & I of Rhinacanthin D



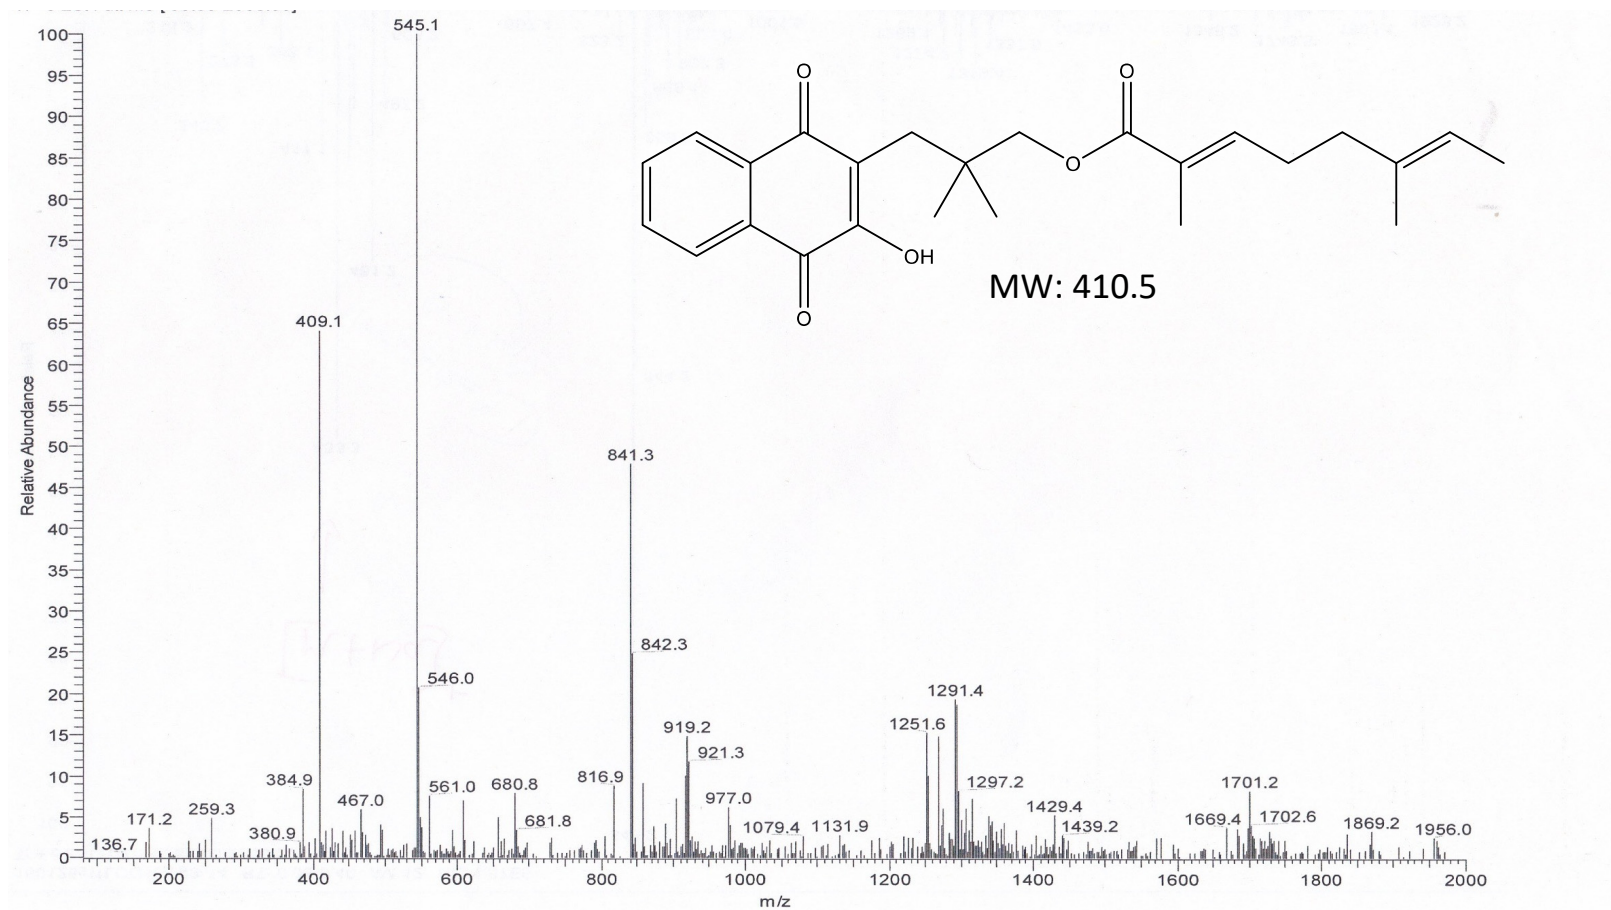

Supplementary Figure S3. Rhinacanthin C Mass Spec. Molecular weight of Rhinacanthin C was determined as 410.5 g/mol.

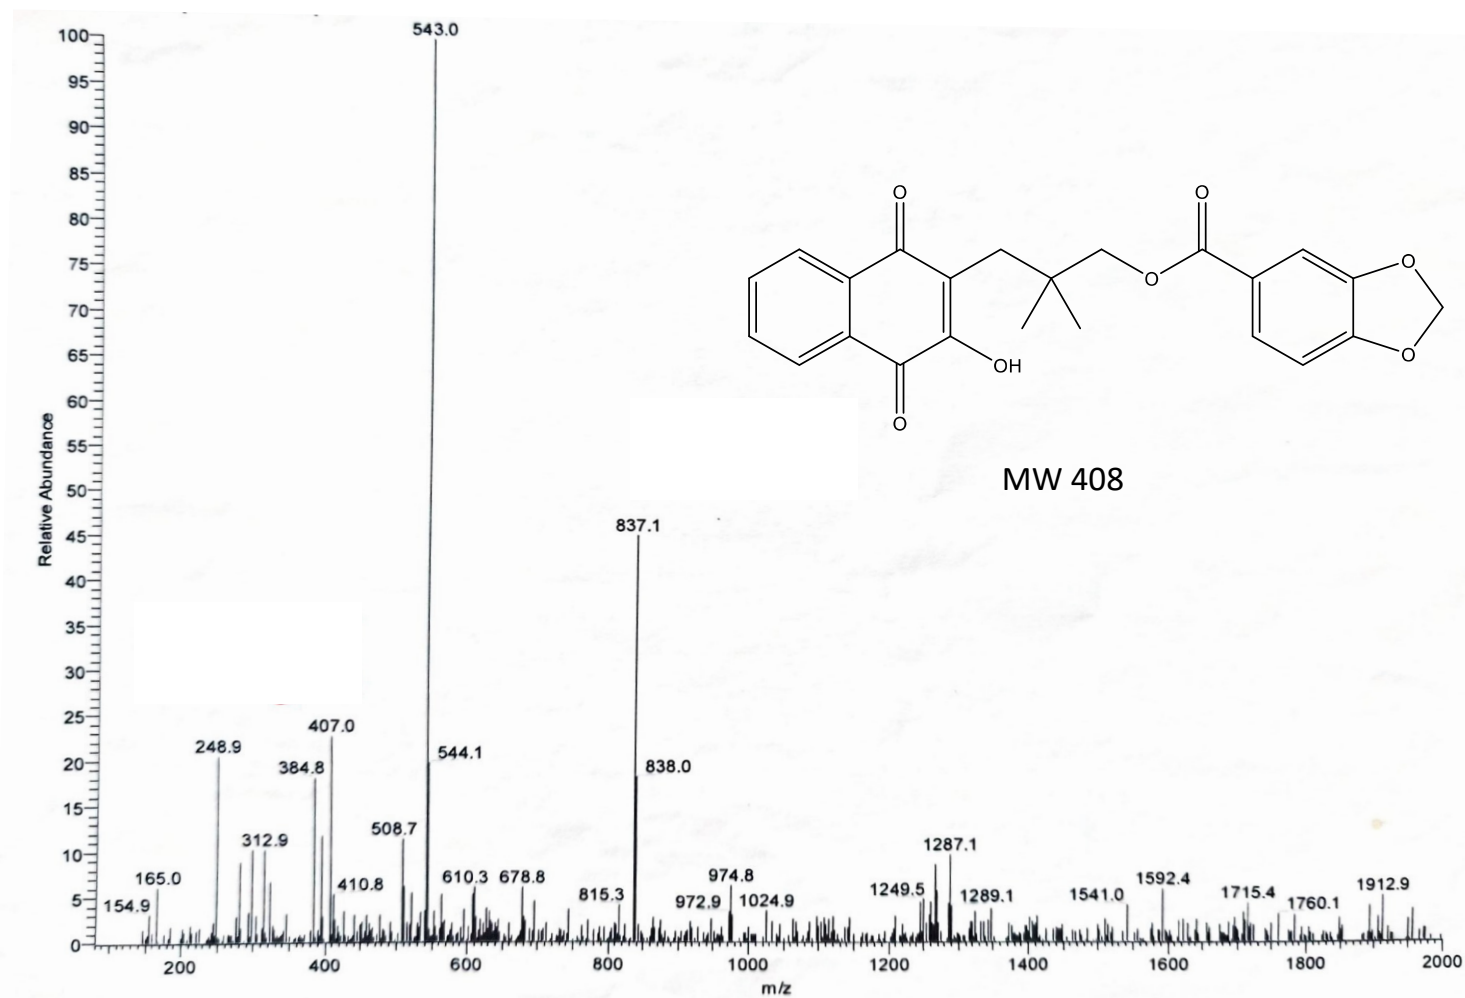

Supplementary Figure S4. Rhinacanthin D Mass Spec. The molecular weight of Rhinacanthin D was determined as 408 g/mol.

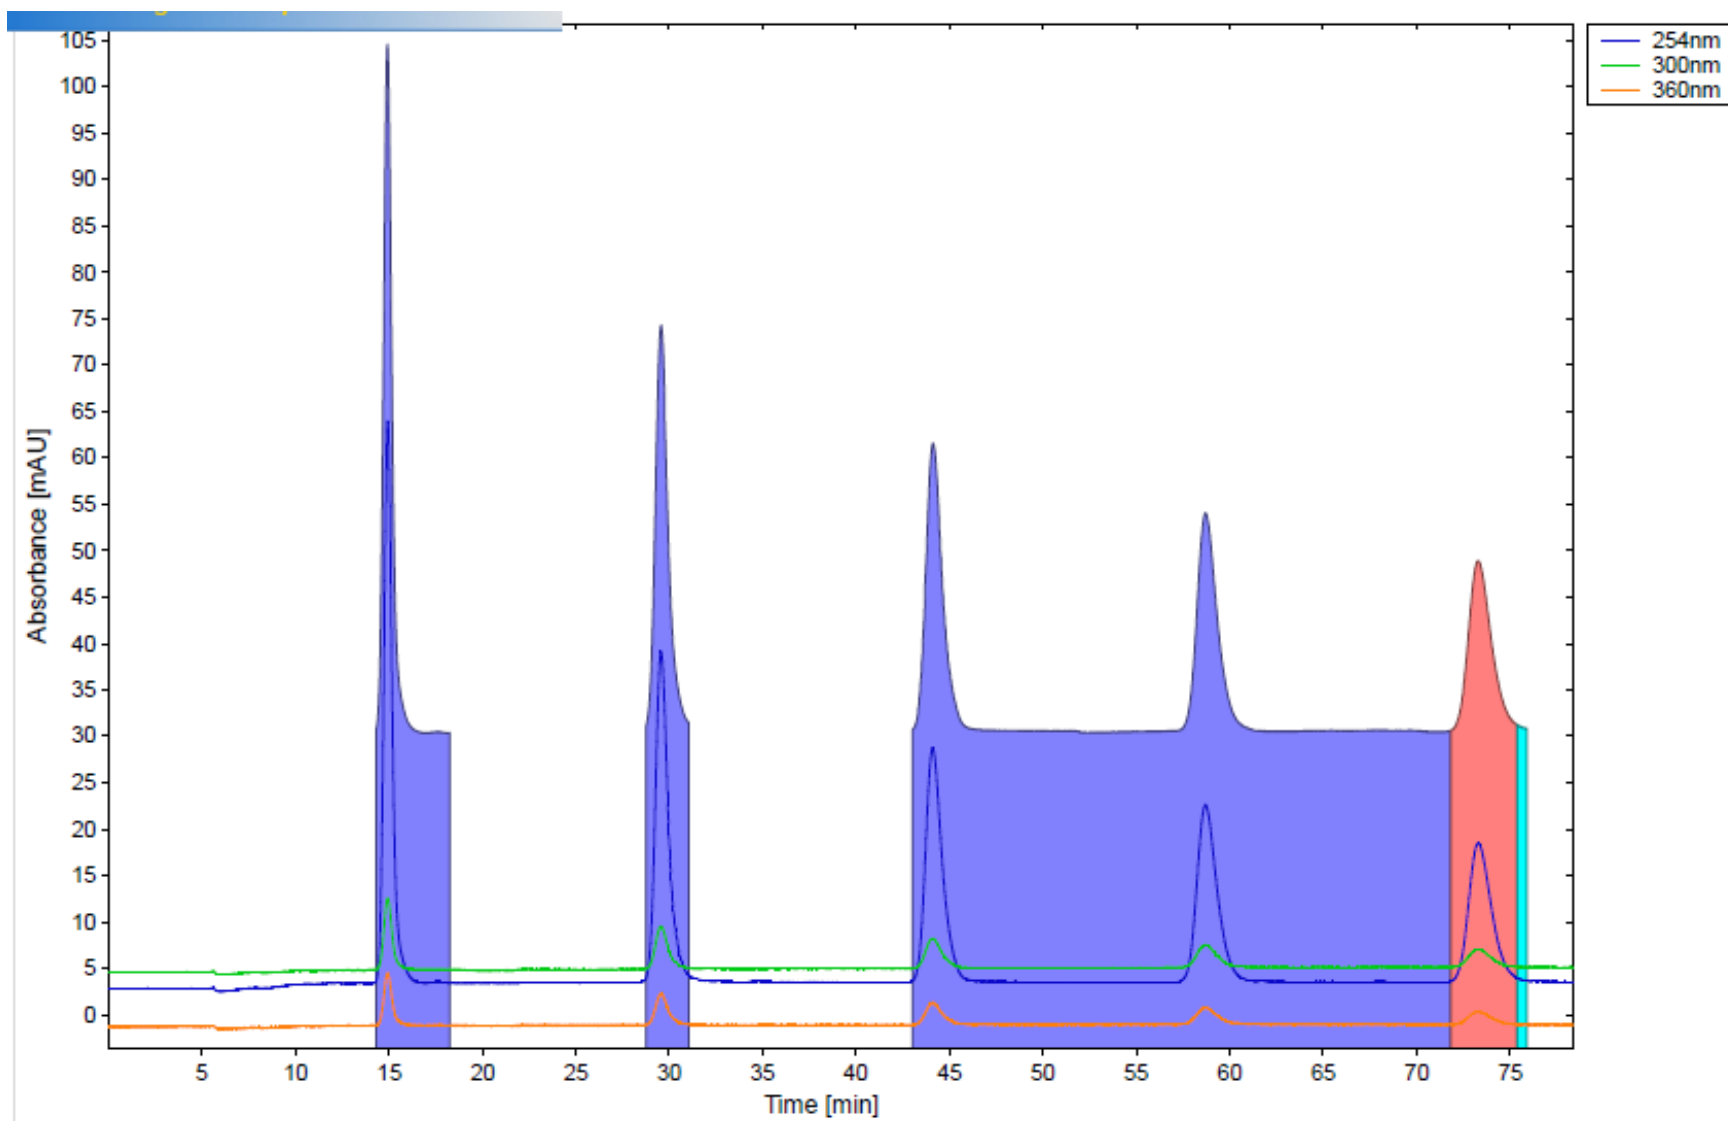

Supplementary figure S5.

Recycling preparative HPLC of Rhinacanthin C, gave repeated symmetrical peaks indicating that the samples were pure for both Rn-C

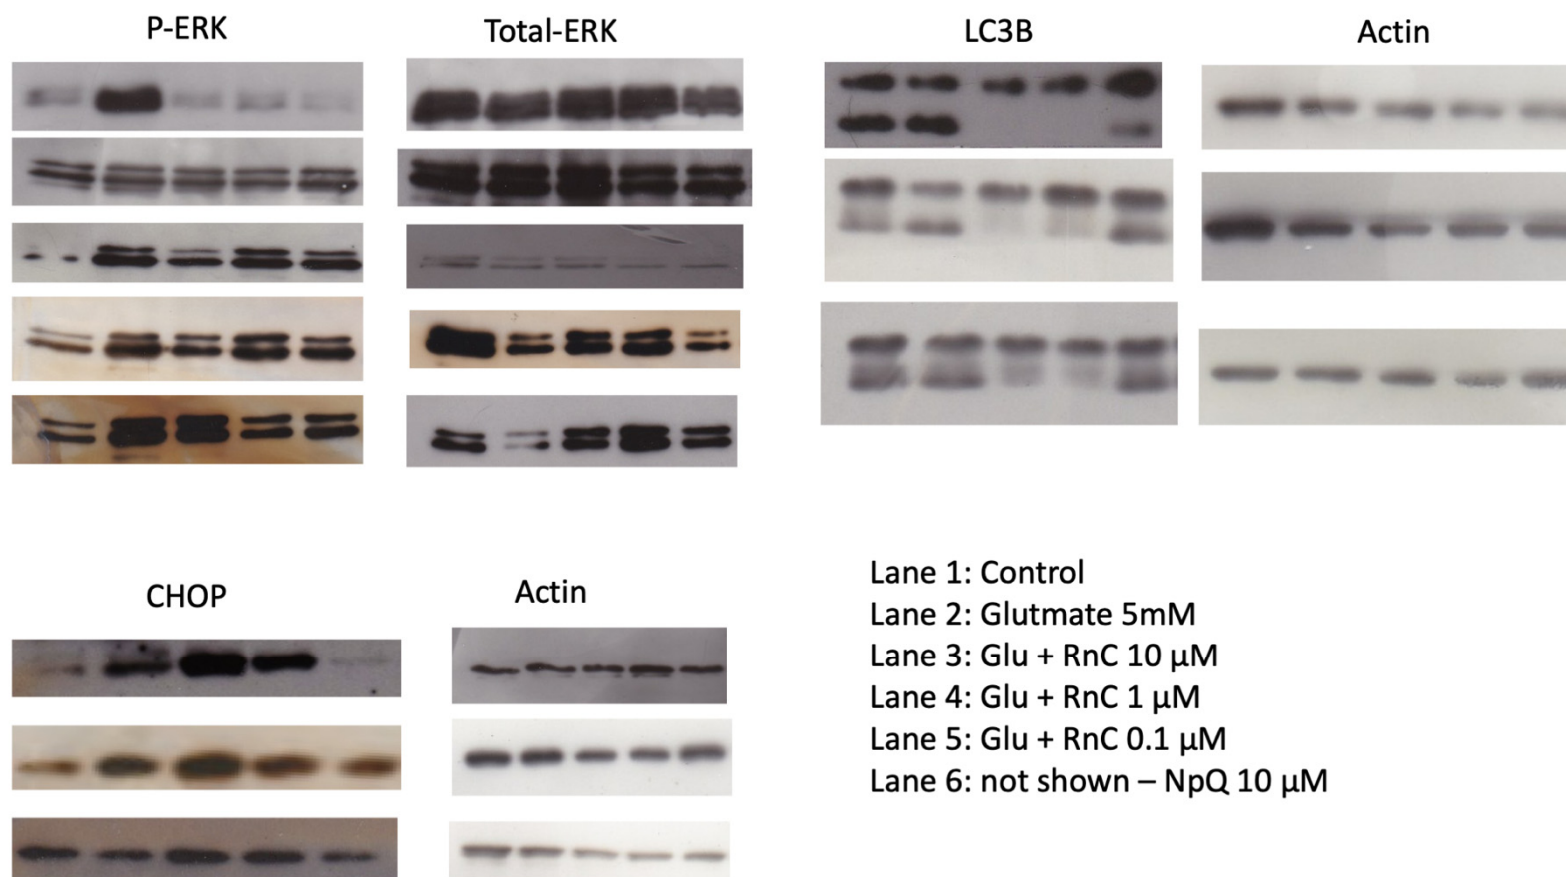

Supplementary Figure S6. All Western blot repeats used for statistical analysis (P-ERK, Total-ERK, LC3B, CHOP and Actin).
